# Supplementary figures and images for: A Peripheral Neuron-to-Microglia Signaling Axis Connecting Transient Viral Infection to Persistent Neuroinflammatory States
Source: Research Square preprint supplement (doi:10.21203/rs.3.rs-7179724/v1), 2025-07-31

Extended Data Figure 1

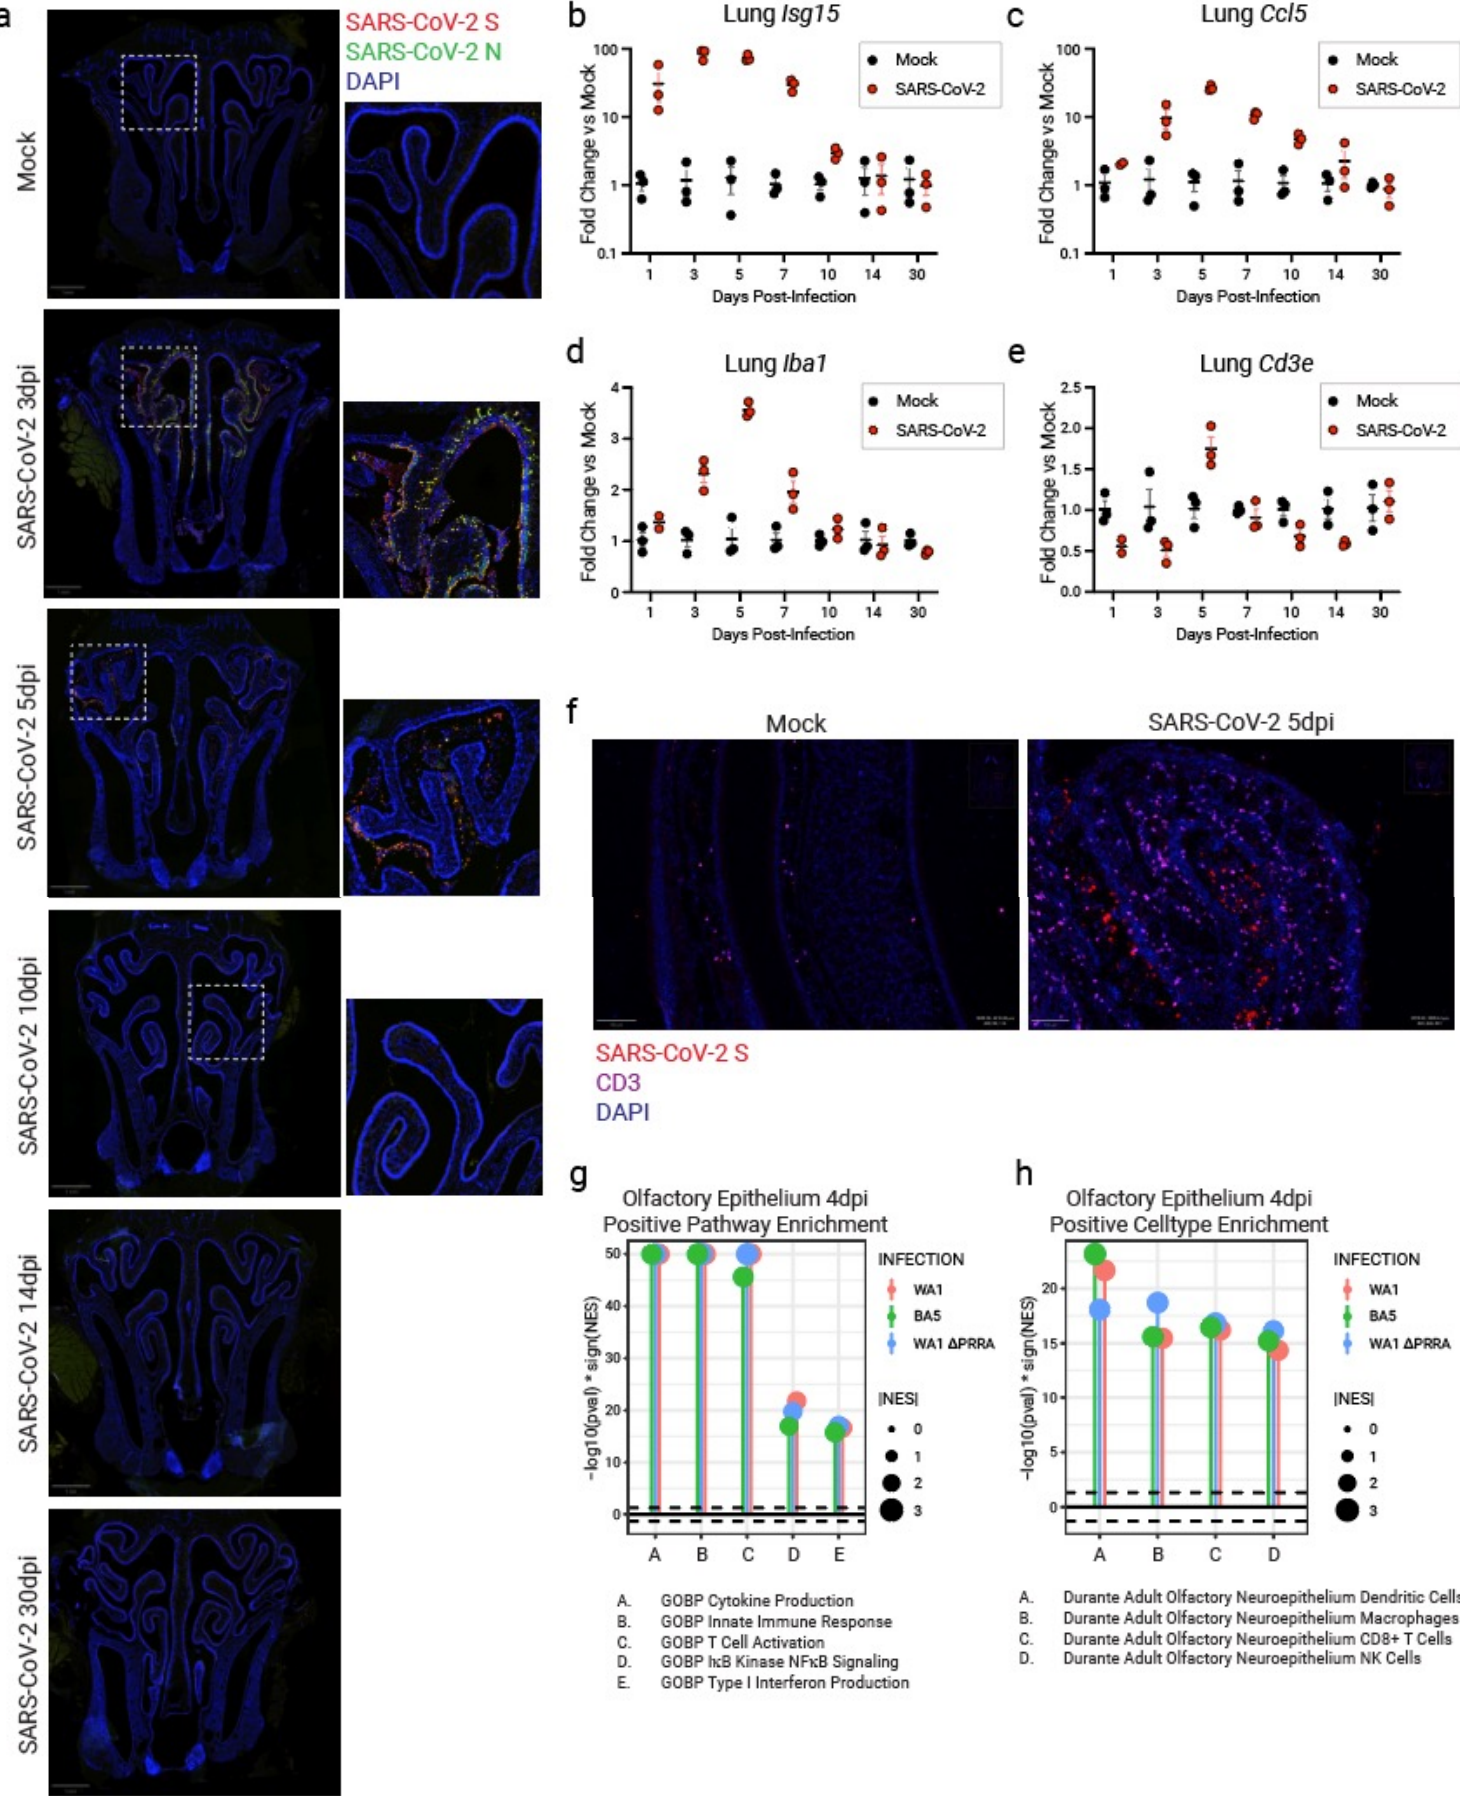

Extended Data Figure 2

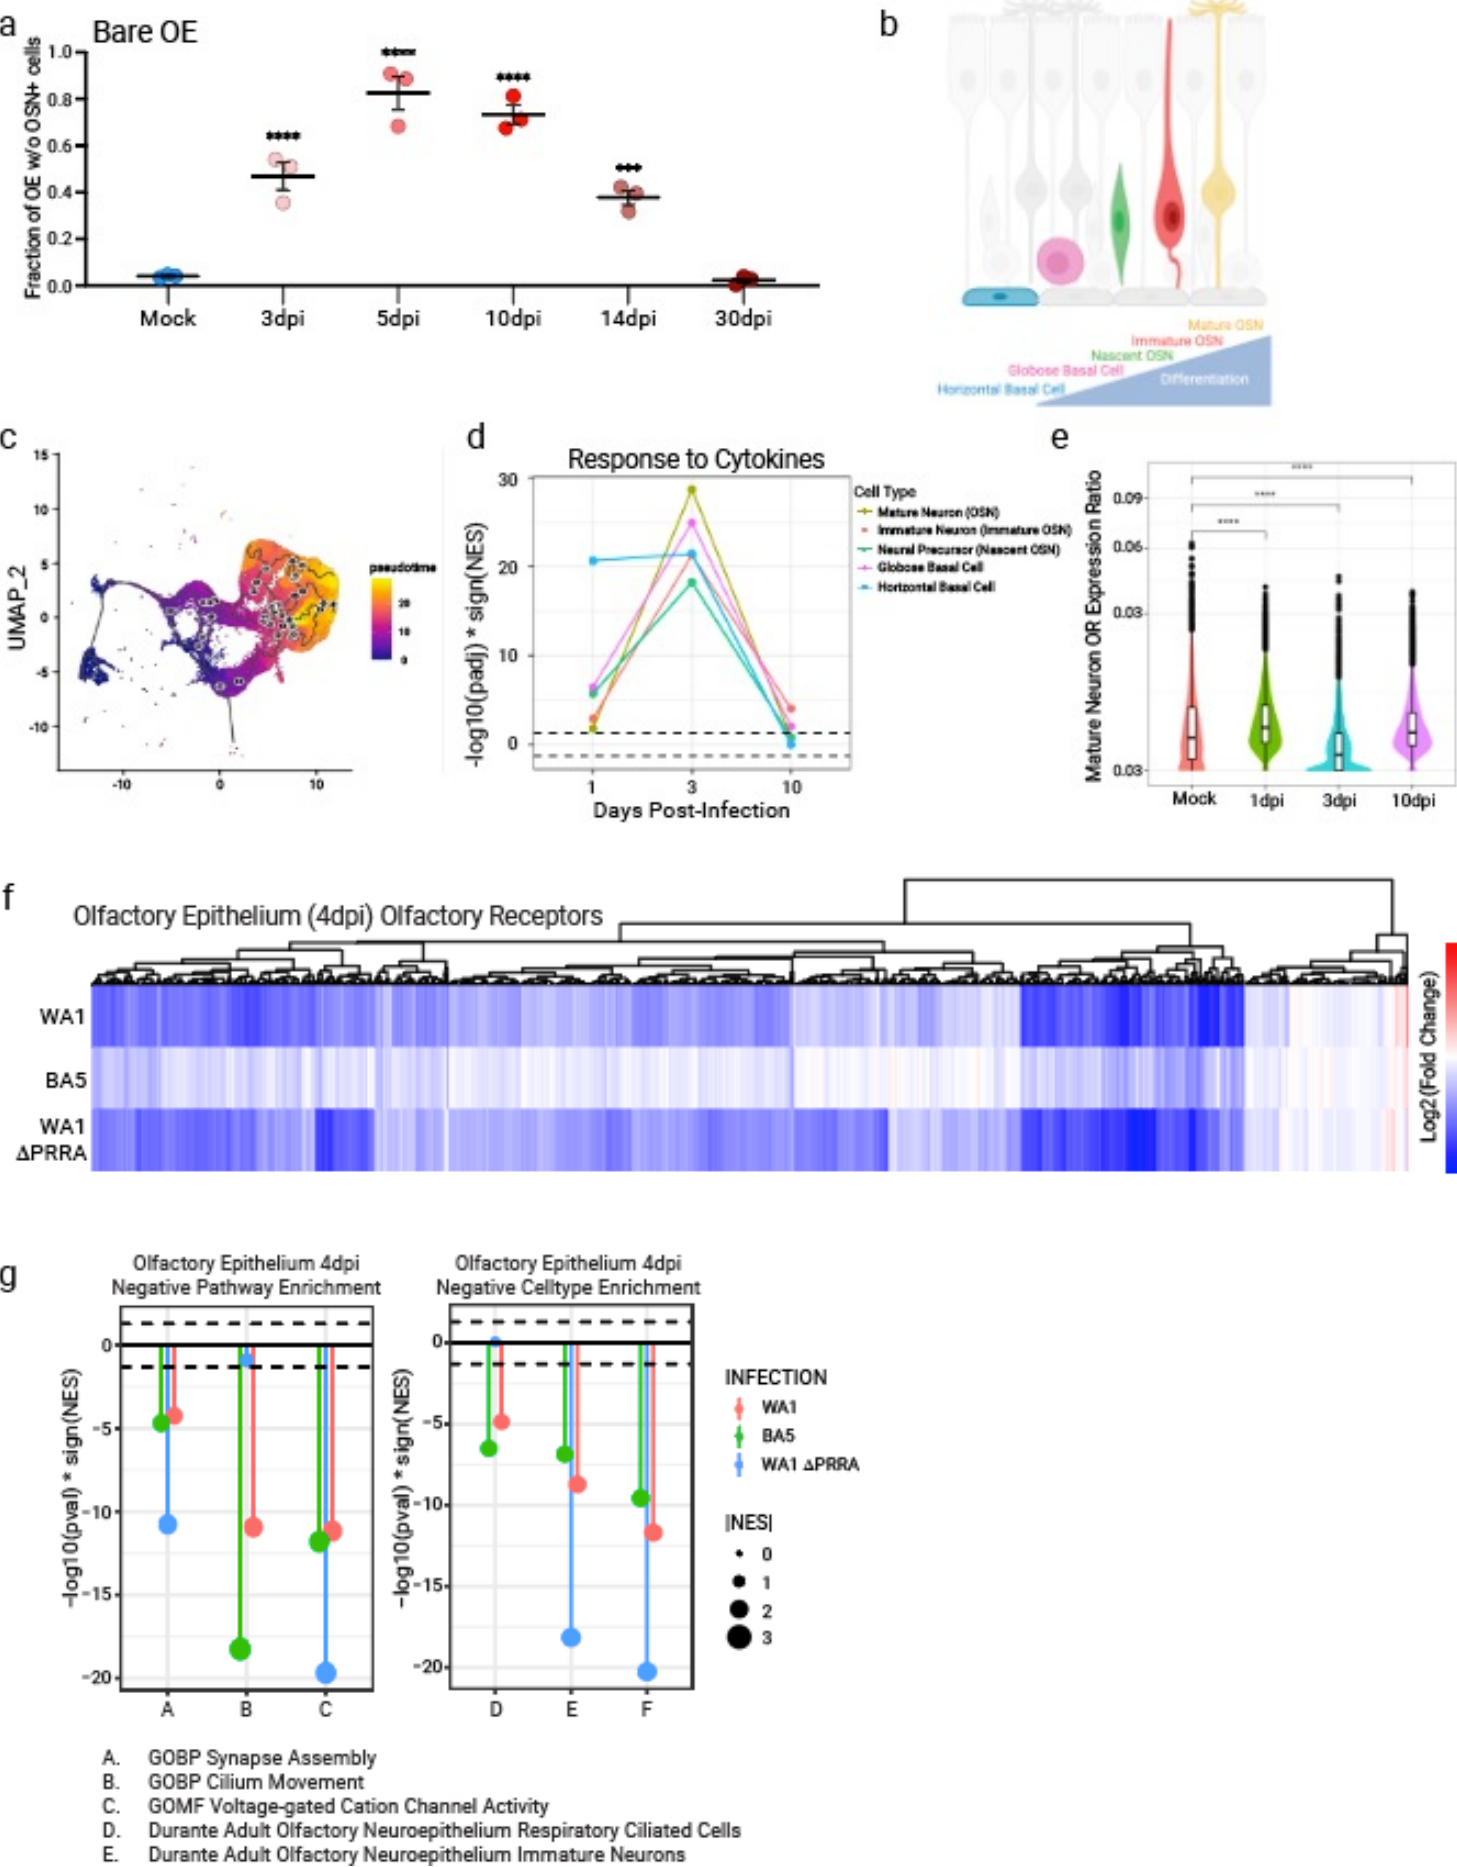

Extended Data Figure 3

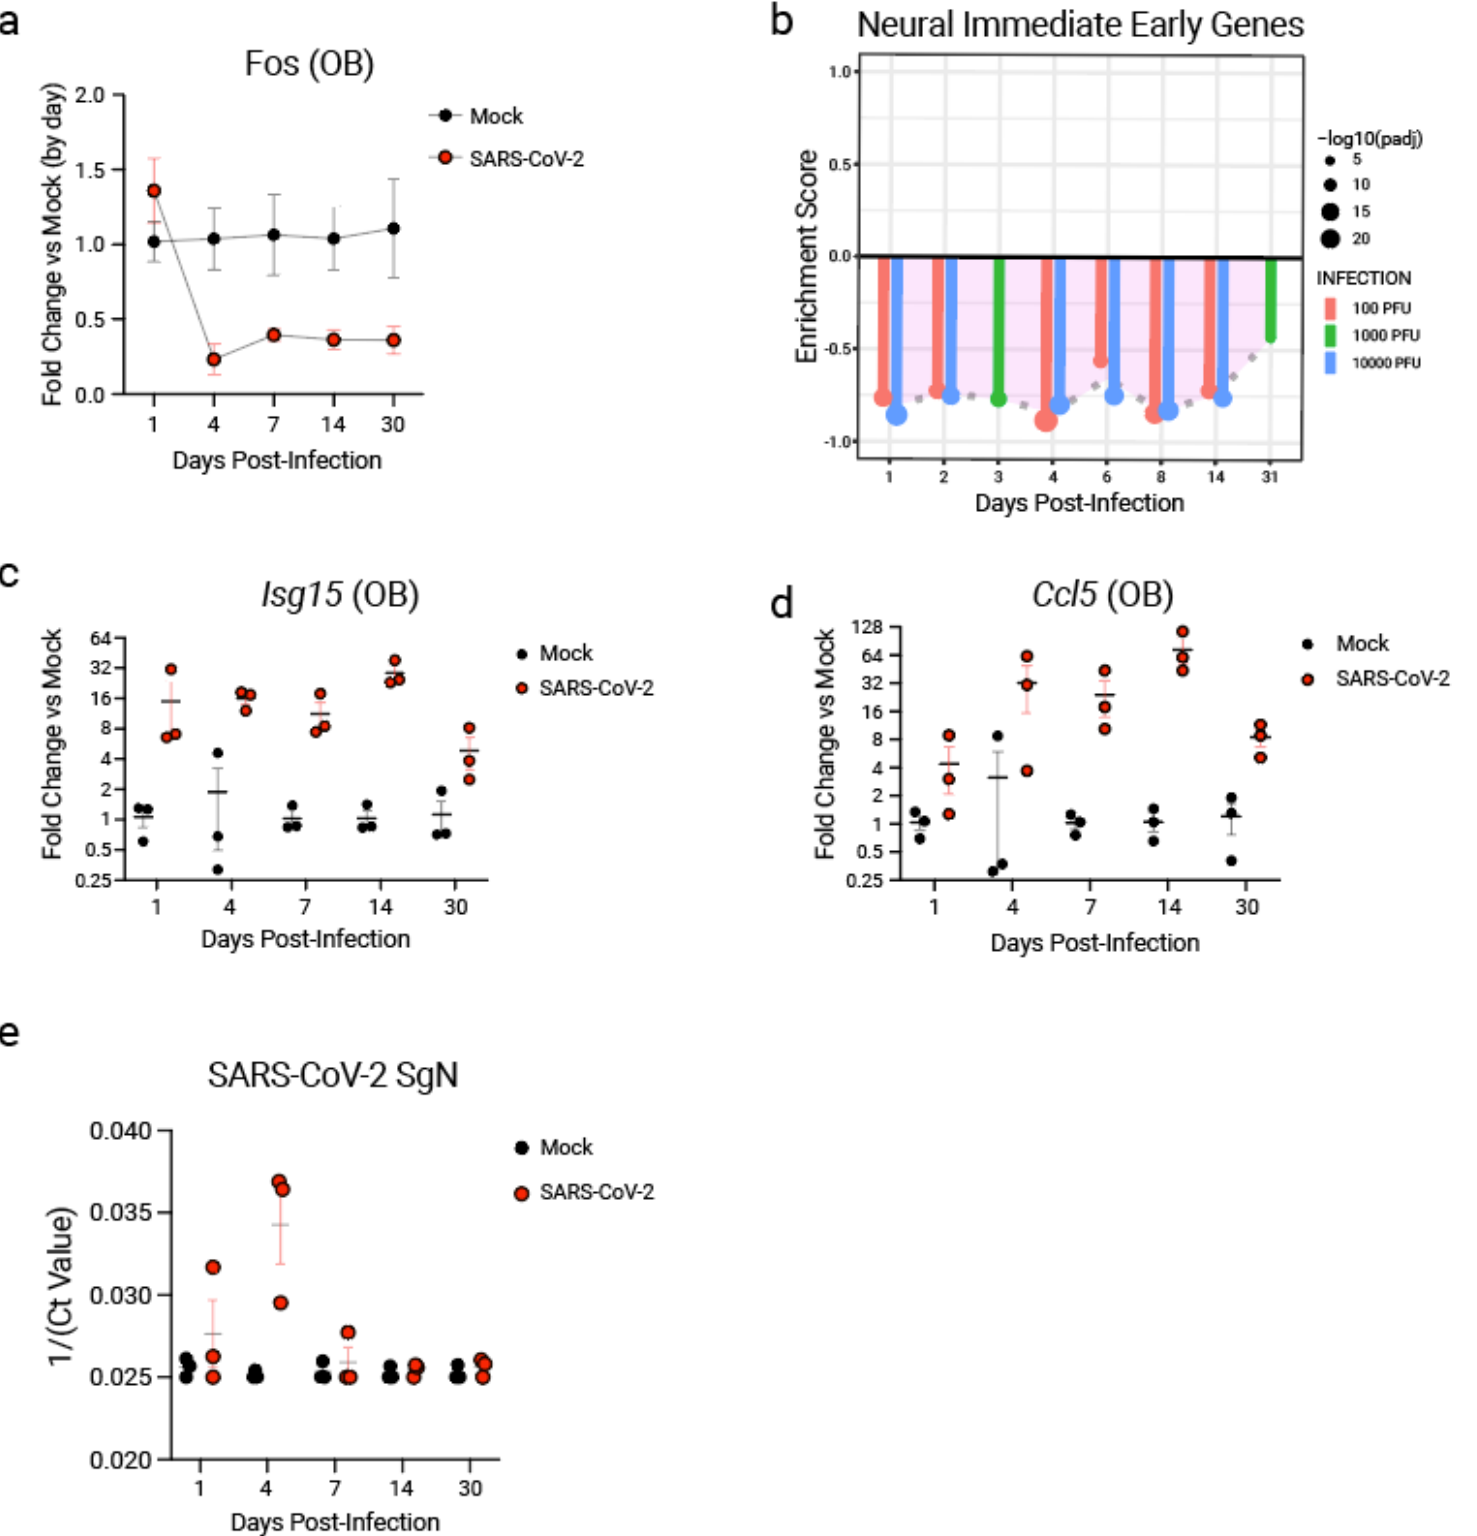



Extended Data Figure 4

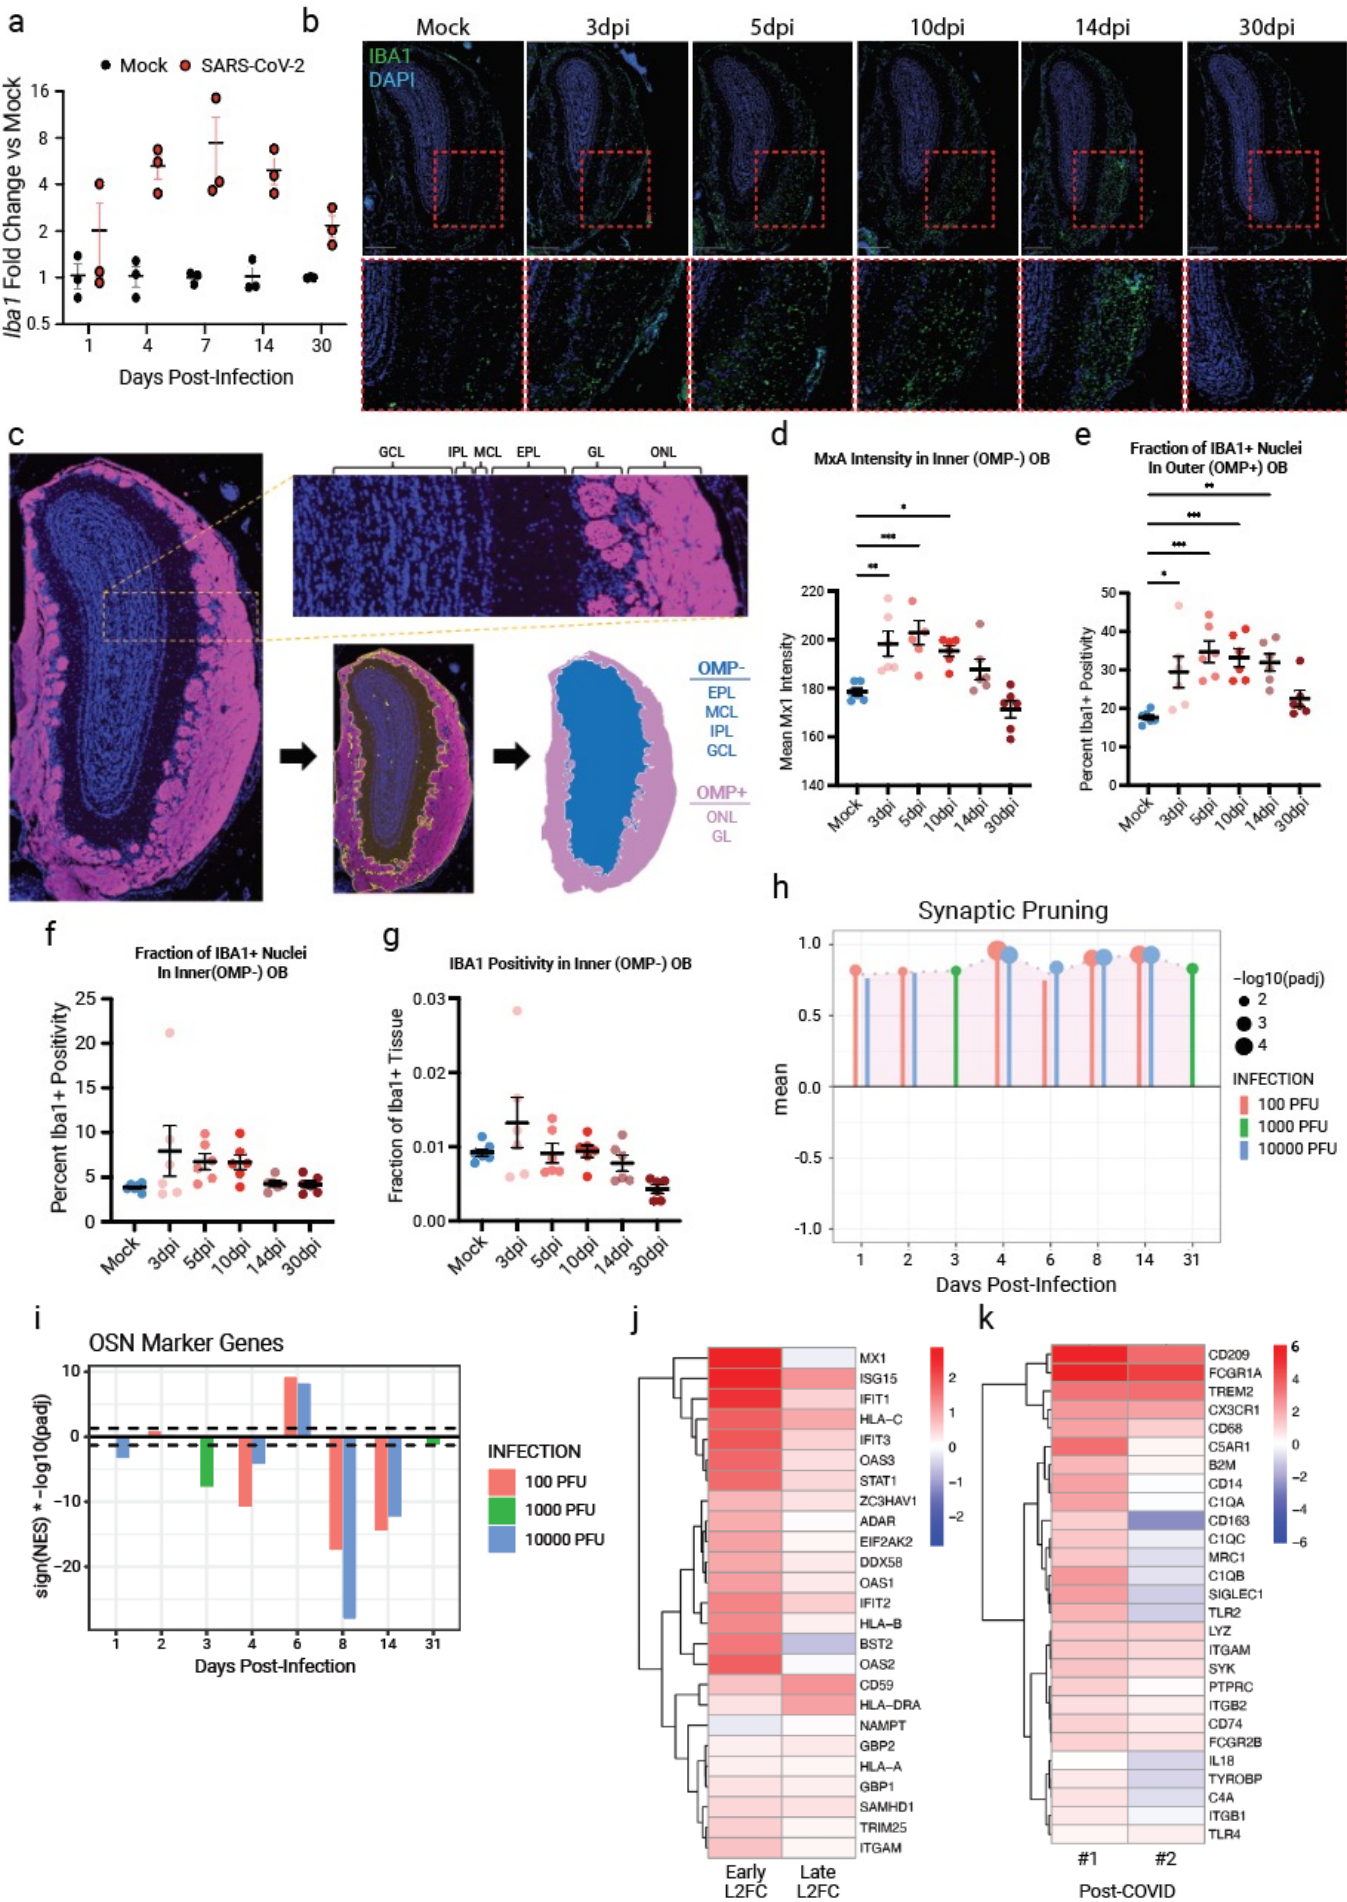

Supplement: Supplementary file 1 [file cdf1a23ebb4ea643ae8d8275.pdf]
